# Supplementary material for: A ‘click’ based fluorescent probe mimicking the IMPLICATION logic gate for Cu(ii) and Pb(ii) sensing: DFT and molecular docking studies
Source: Royal Society of Chemistry journal article supplement (doi:10.1039/d4ay01197j), 2024-01-01
Supplement: d4ay01197j1.pdf [file d4ay01197j1.pdf]

**Supplementary Information**

**‘Click’ based fluorescent probe mimicking IMPLICATION logic gate for Cu(II) and Pb(II) sensing: DFT and Molecular Docking studies**

**Gurleen Singh,<sup>a</sup> Gurjaspreet Singh,<sup>b</sup> Sushma,<sup>c</sup> Gagandeep Kaur,<sup>d</sup> Gurpreet Kaur,<sup>e</sup> Harminder Singh,<sup>a,#</sup> Jandeep Singh,<sup>a,\*</sup>**

<sup>a</sup> School of Chemical Engineering and Physical Sciences, Lovely Professional University, Phagwara–144411, Punjab, India

<sup>b</sup> Department of Chemistry and Centre of Advanced Studies in Chemistry, Panjab University, Chandigarh–160014, Punjab, India

<sup>c</sup> Chitkara College of Pharmacy, Chitkara University, Punjab 140401, India

<sup>d</sup> Material Application Research Lab. (MARL), Department of Nano Science and Materials, Central University of Jammu, Jammu 181143, India

<sup>e</sup> Department of Chemistry, Gujranwala Guru Nanak Khalsa College, Civil lines, Ludhiana–141001 (Punjab), India

**#,\* Corresponding Authors**

**Contact details:**

**\*singhjandeep@gmail.com**

**Contents:**

**Figure S1:** IR spectrum of alkyne **2**

**Figure S2:**  $^1\text{H}$  NMR spectrum of alkyne **2**

**Figure S3:**  $^{13}\text{C}$  NMR spectrum of alkyne **2**

**Figure S4:** IR spectrum of 1-(azidomethyl)naphthalene

**Figure S5:**  $^1\text{H}$  NMR spectrum of 1-(azidomethyl)naphthalene

**Figure S6:**  $^{13}\text{C}$  NMR spectrum of 1-(azidomethyl)naphthalene

**Figure S7:** IR spectrum of probe **GT**

**Figure S8:**  $^1\text{H}$  NMR spectrum of probe **GT**

**Figure S9:**  $^{13}\text{C}$  NMR spectrum of probe **GT**

**Figure S10:** Mass spectrum of probe **GT**

**Figure S11:** UV-Vis spectrum of probe **GT** (0.05 mM) in DMSO depicting absorption maxima at  $\lambda_{\text{max}} = 274$  nm, 284 nm, and 294 nm

**Figure S12:** UV-Vis spectra of probe **GT** (0.05 mM) in DMSO signifying the recognition of (a) Cu(II) among various metal ions in the absence of Pb(II); (b) Pb(II) among various metal ions in the absence of Cu(II); and (c) recognition of Pb(II) among various metal ions present in equimolar concentration including Cu(II)

**Figure S13:** Time dependent absorption spectra of **GT**-metal complex solution displaying the trend in the absorption intensity with the passage of time: (a) **GT**-Cu(II) (b) **GT**-Pb(II)

**Figure S14:** Temperature dependent absorption spectra of **GT**-metal complex solution demonstrating the trend in the absorption intensity over varying temperature range: (a) **GT**-Cu(II) (b) **GT**-Pb(II)

**Figure S15:**  $^1\text{H}$  NMR spectrum of **GT**-metal complex

**Figure S16:** IR spectrum of **GT**-metal complex

**Table S1:** Cartesian co-ordinates of probe **GT**

**Table S2:** Cartesian co-ordinates of **GT**-metal complex

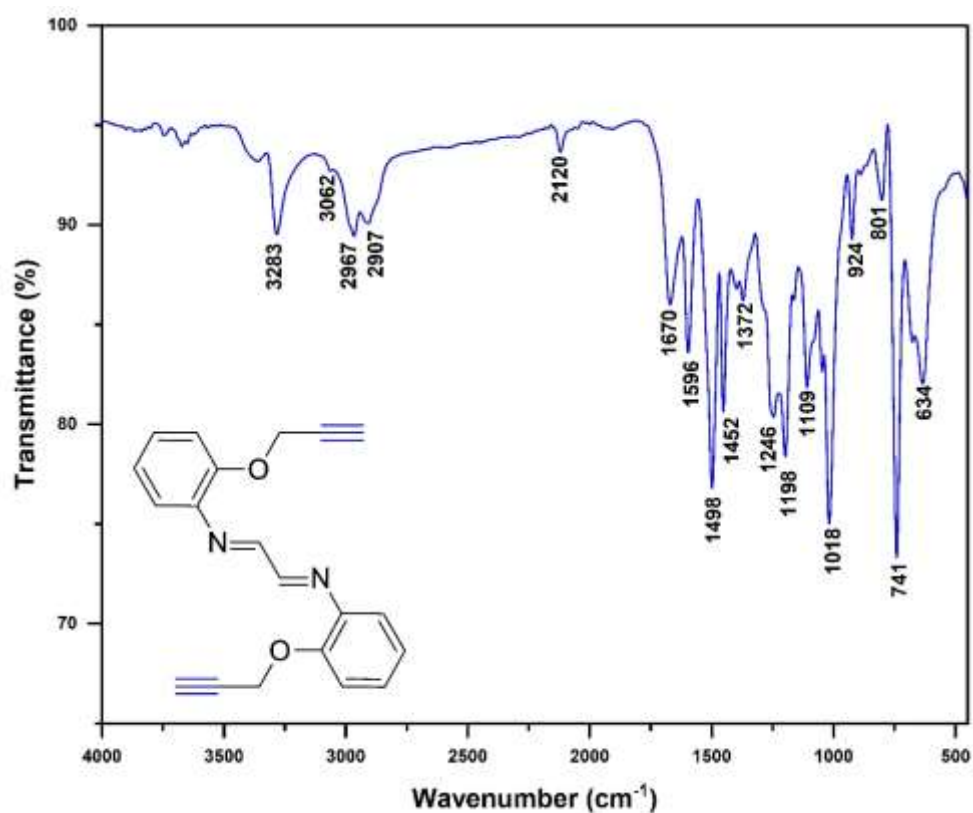

Figure S1. IR spectrum of alkyne 2

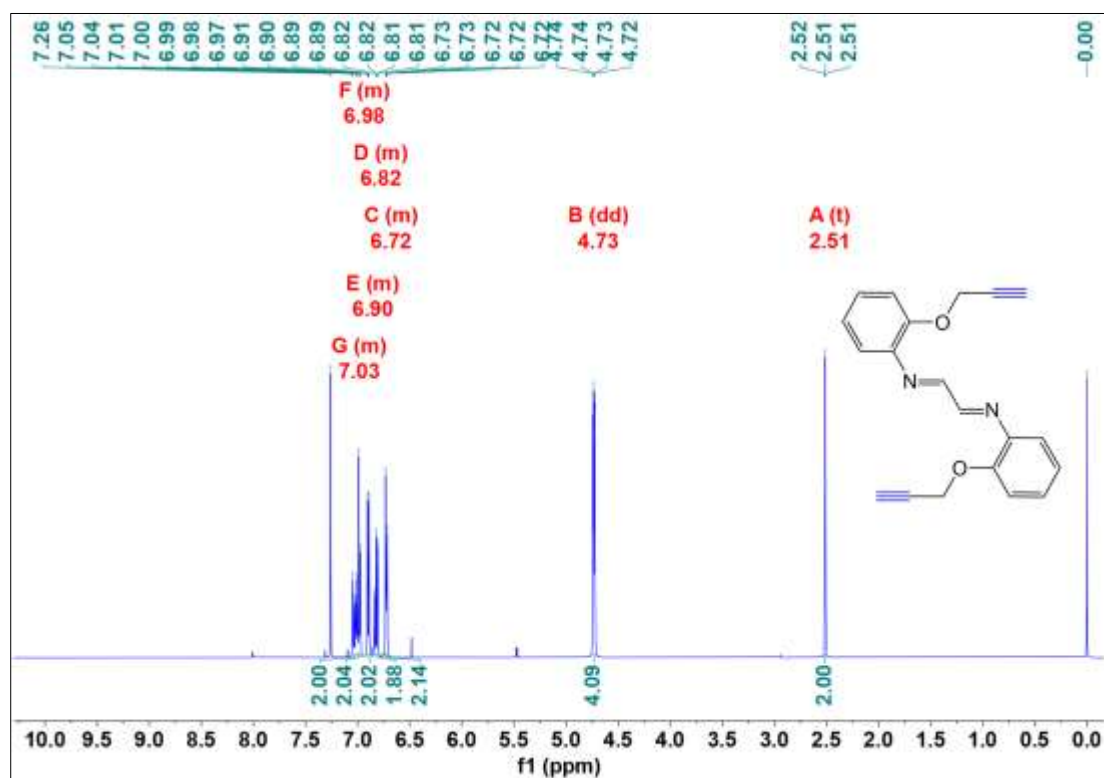

Figure S2.  $^1\text{H}$  NMR spectrum of alkyne 2

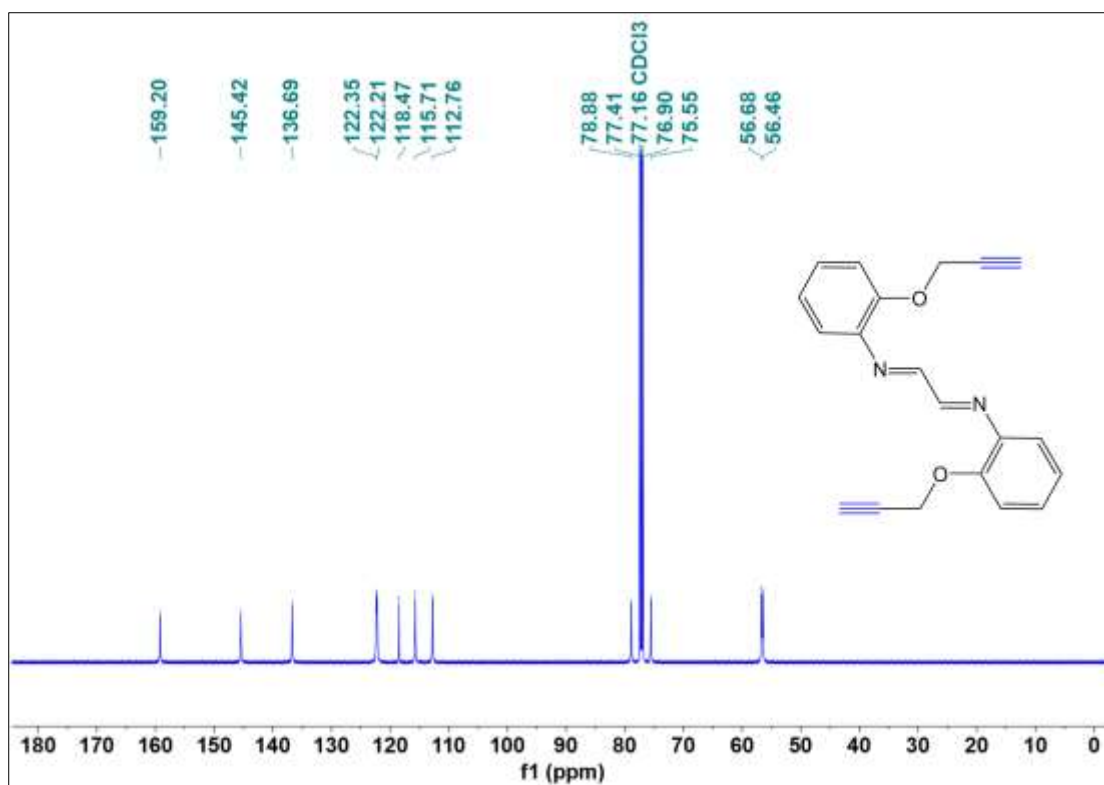

Figure S3. <sup>13</sup>C NMR spectrum of alkyne 2

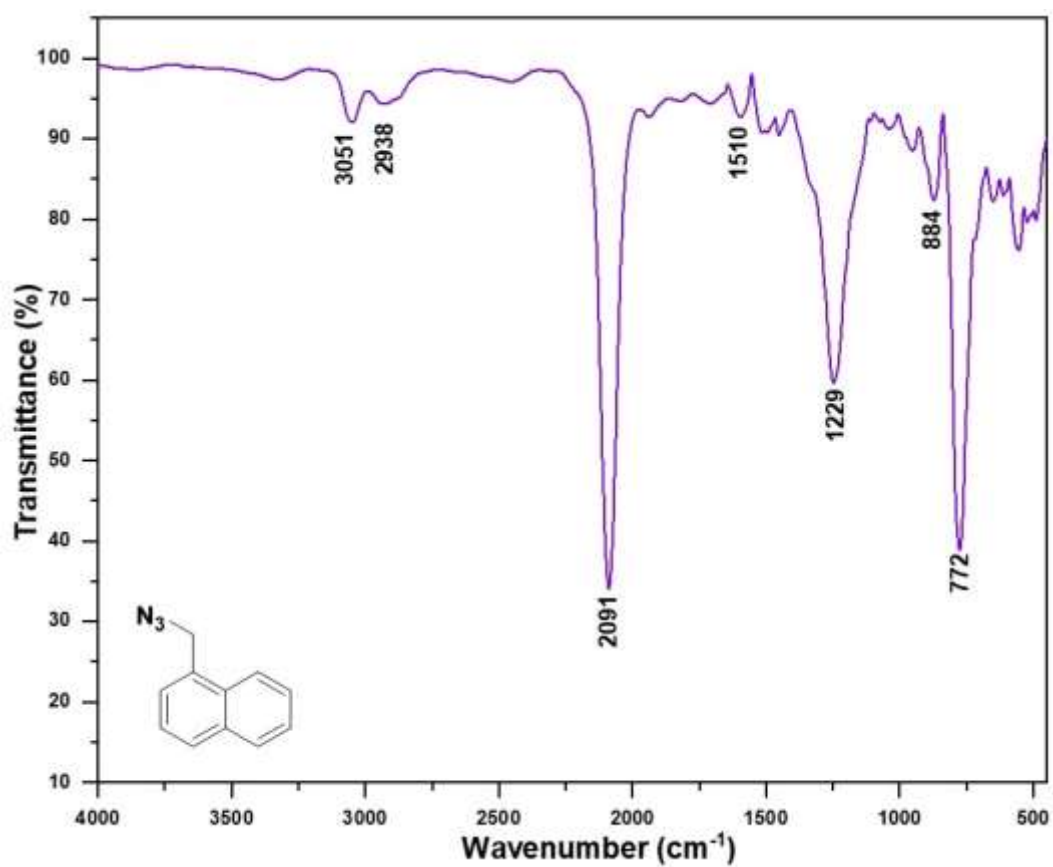

Figure S4. IR spectrum of 1-(azidomethyl)naphthalene

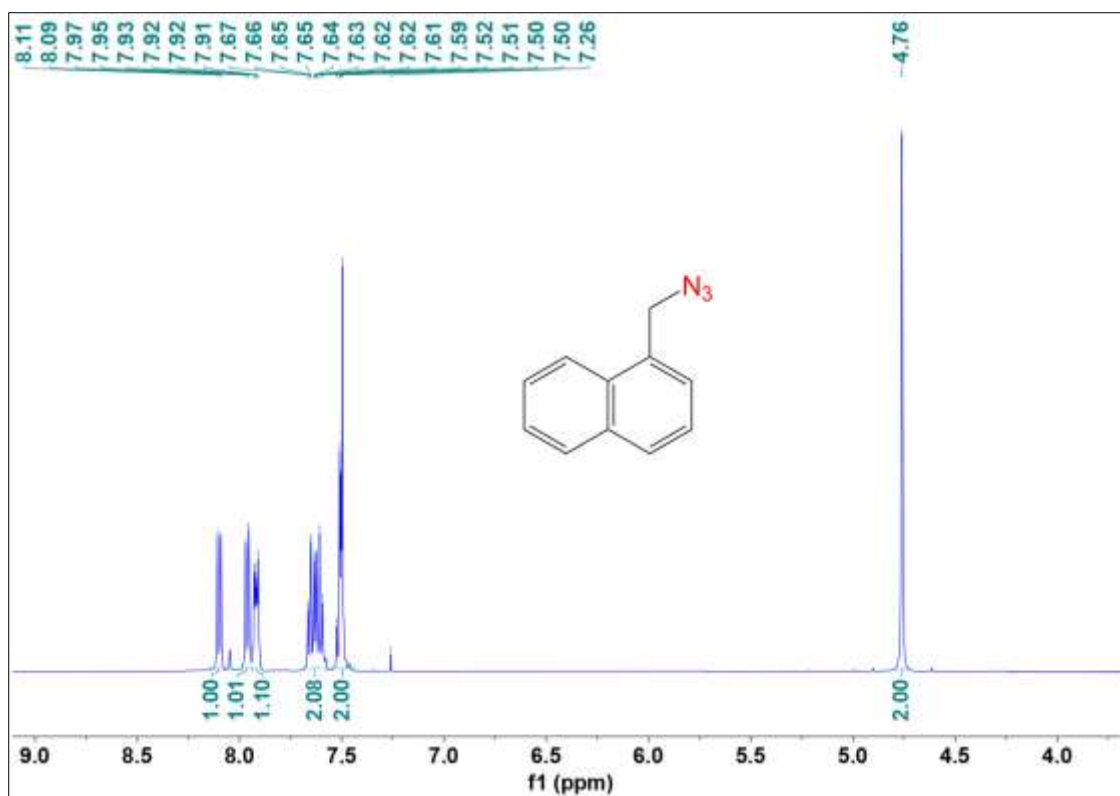

**Figure S5.**  $^1\text{H}$  NMR spectrum of 1-(azidomethyl)naphthalene

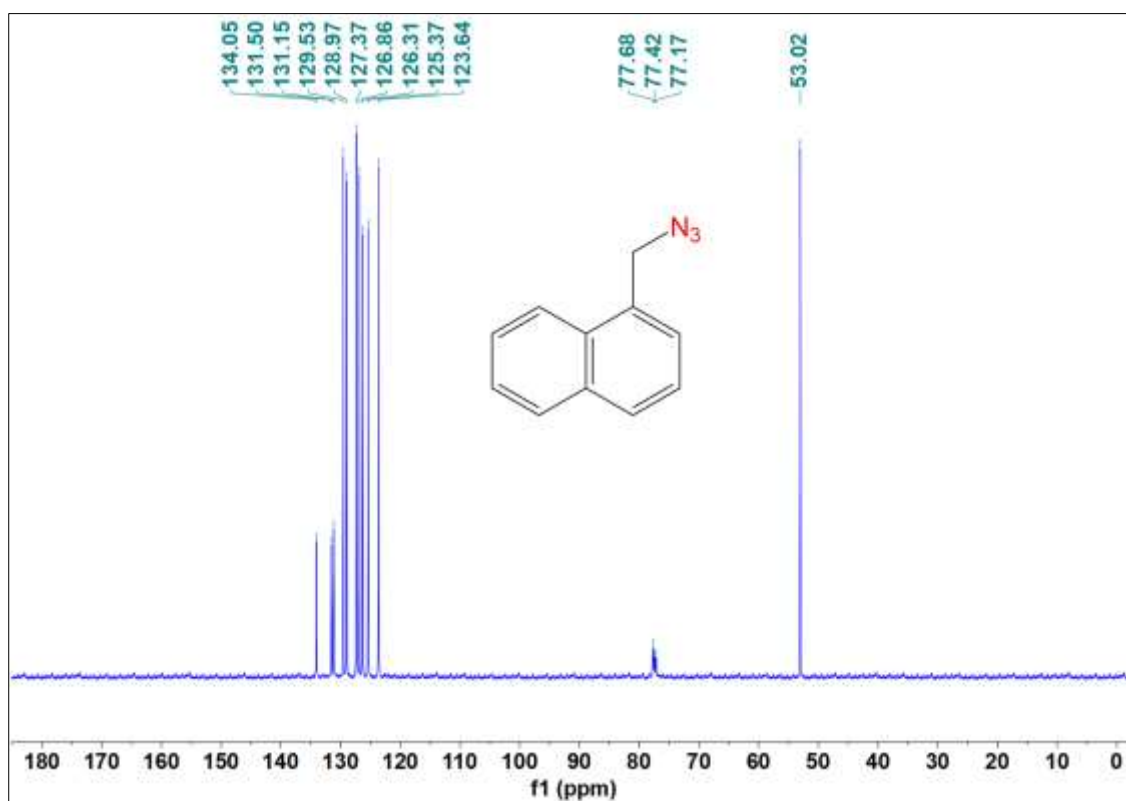

**Figure S6.**  $^{13}\text{C}$  NMR spectrum of 1-(azidomethyl)naphthalene

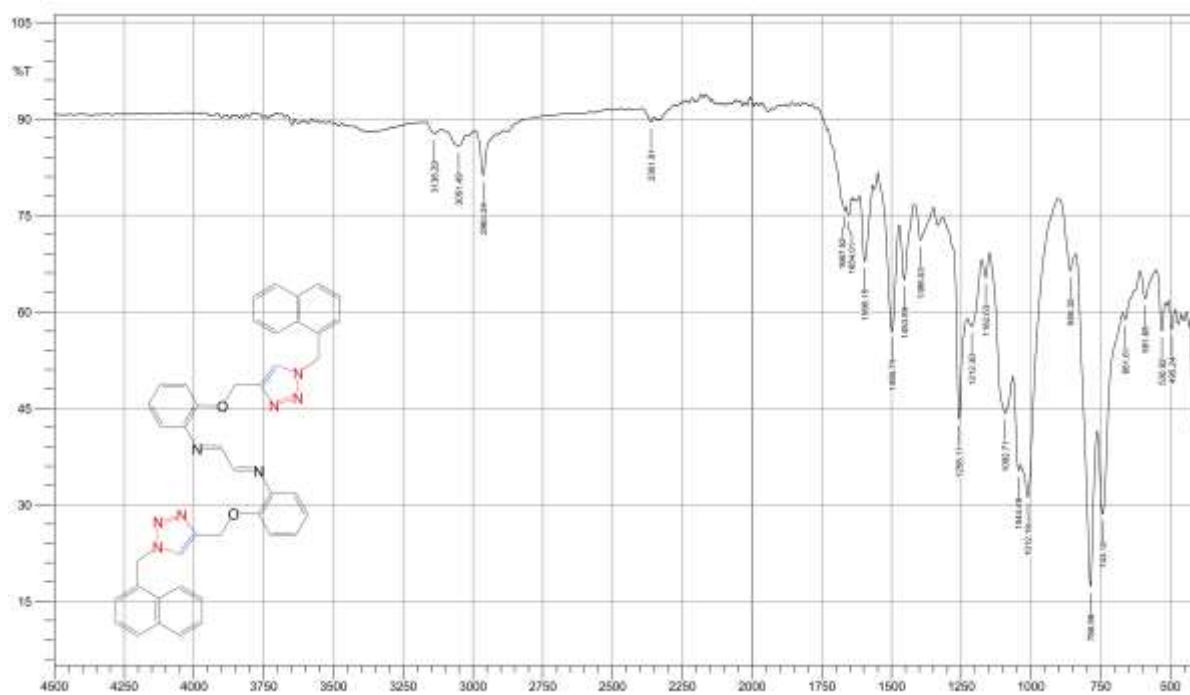

**Figure S7.** IR spectrum of probe **GT**

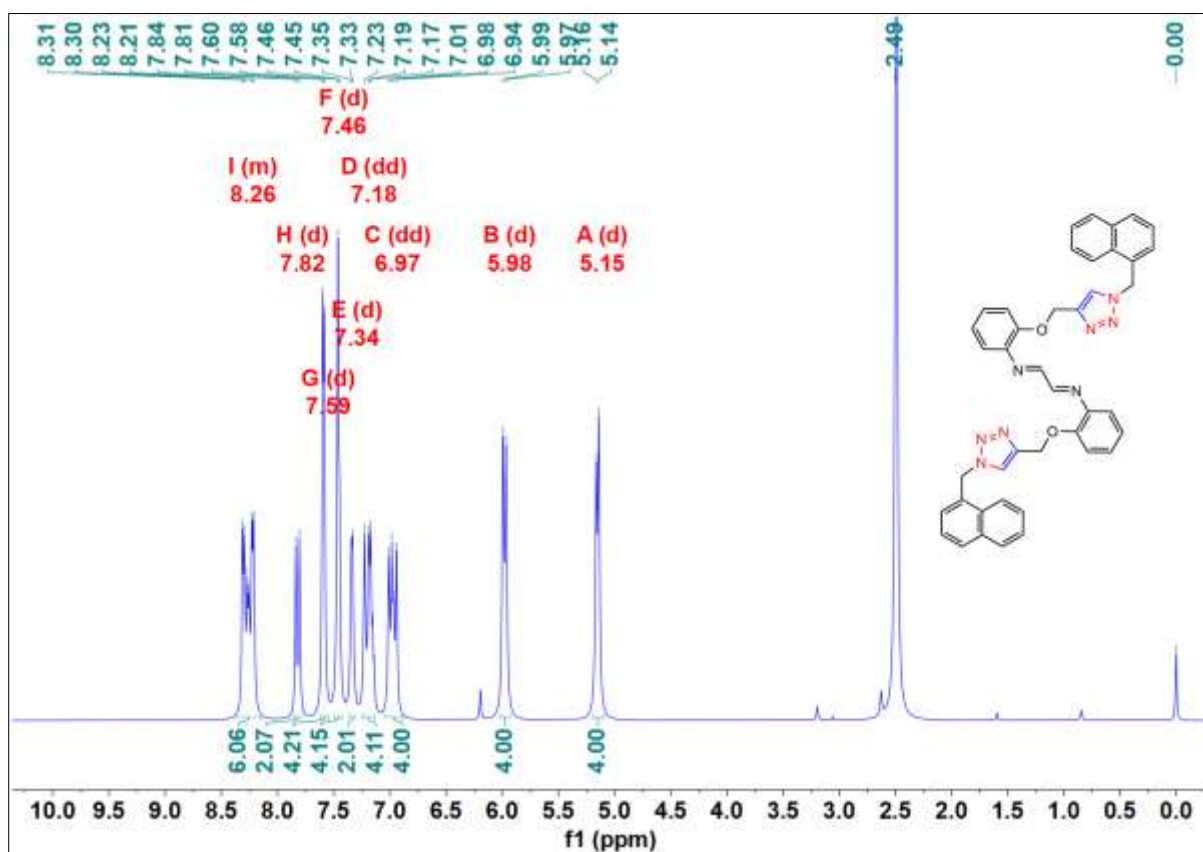

**Figure S8.**  $^1\text{H}$  NMR spectrum of probe **GT**

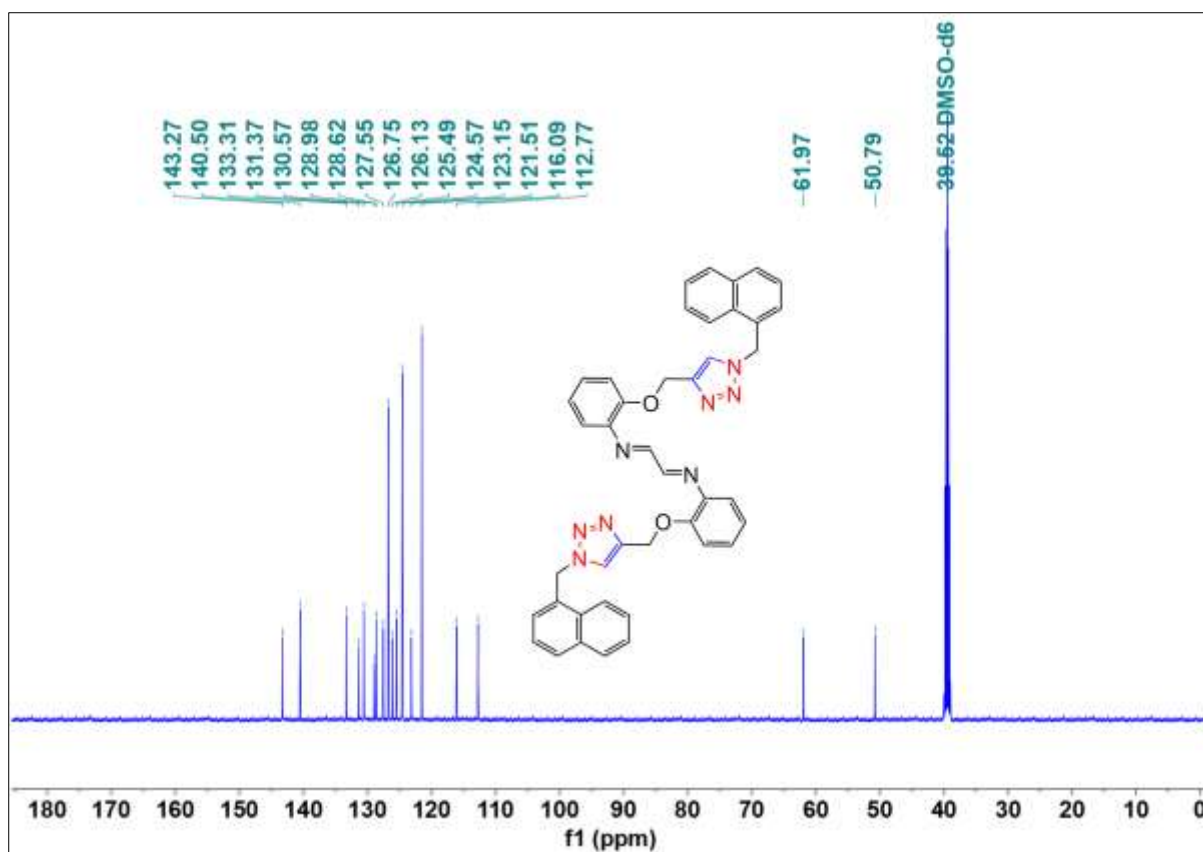

**Figure S9.** <sup>13</sup>C NMR spectrum of probe GT

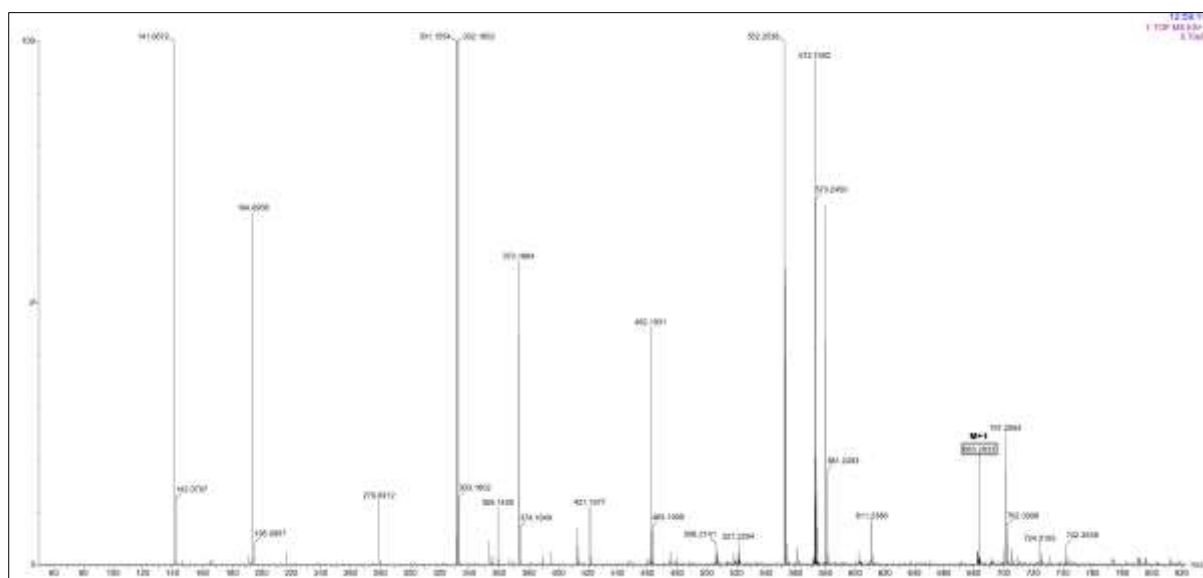

**Figure S10.** Mass spectrum of probe GT

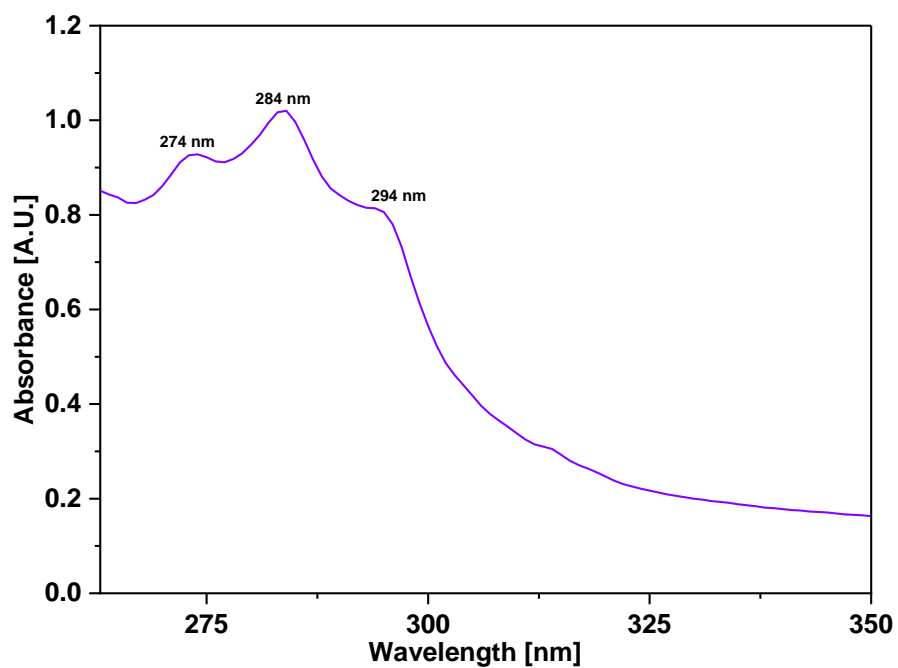

**Figure S11.** UV-Vis spectrum of probe **GT** (0.05 mM) in DMSO depicting absorption maxima at  $\lambda_{\text{max}} = 274 \text{ nm}$ , 284 nm, and 294 nm

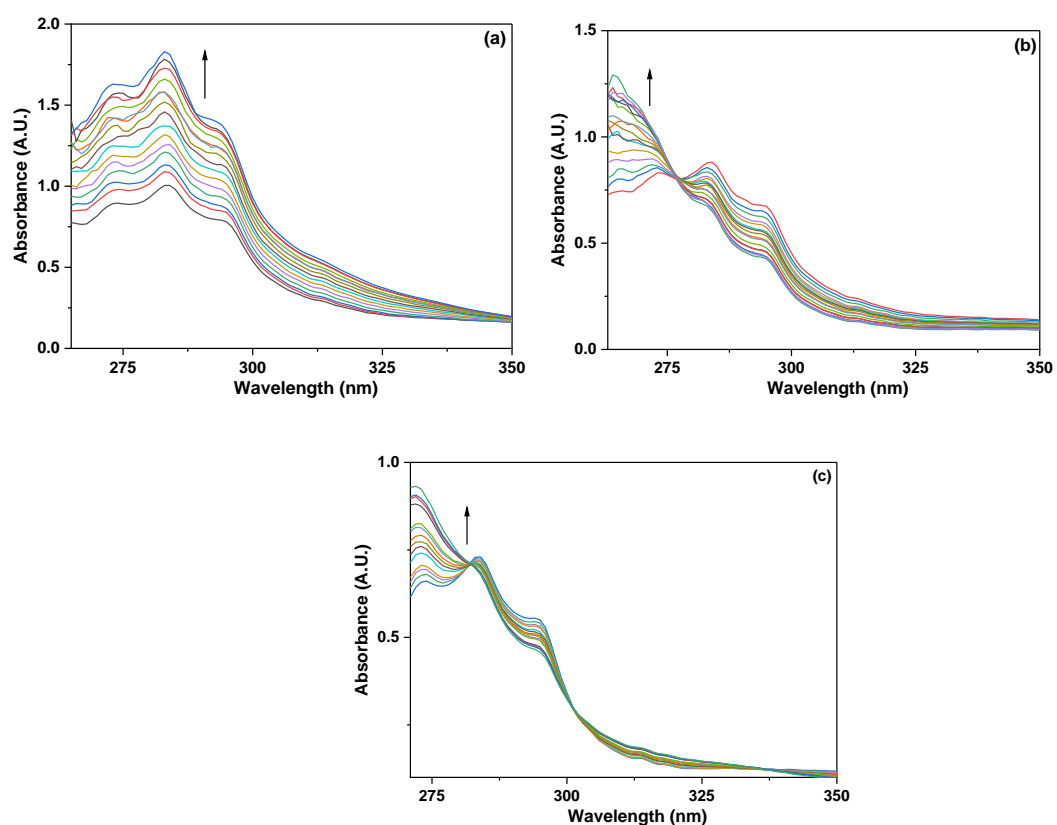

**Figure S12.** UV-Vis spectra of probe **GT** (0.05 mM) in DMSO signifying the recognition of (a) Cu(II) among various metal ions in the absence of Pb(II); (b) Pb(II) among various metal



ions in the absence of Cu(II); and (c) recognition of Pb(II) among various metal ions present in equimolar concentration including Cu(II)

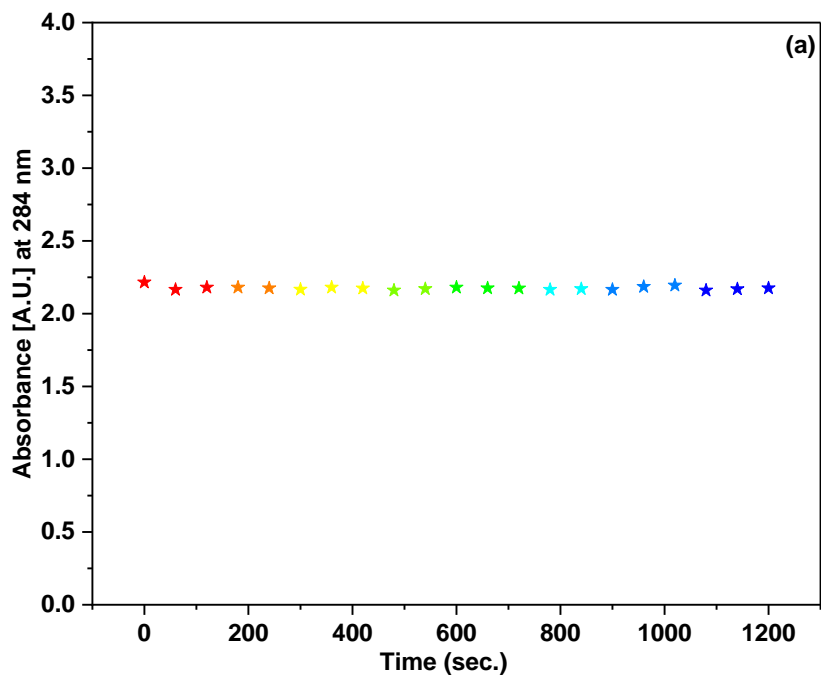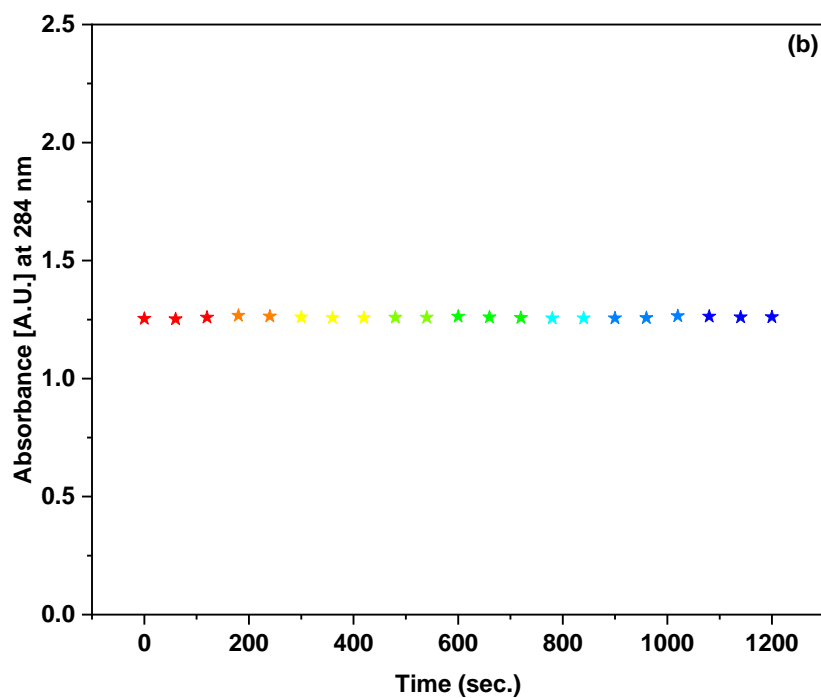

**Figure S13.** Time dependent absorption spectra of **GT**-metal complex solution displaying the trend in the absorption intensity with the passage of time: (a) **GT**-Cu(II) (b) **GT**-Pb(II)

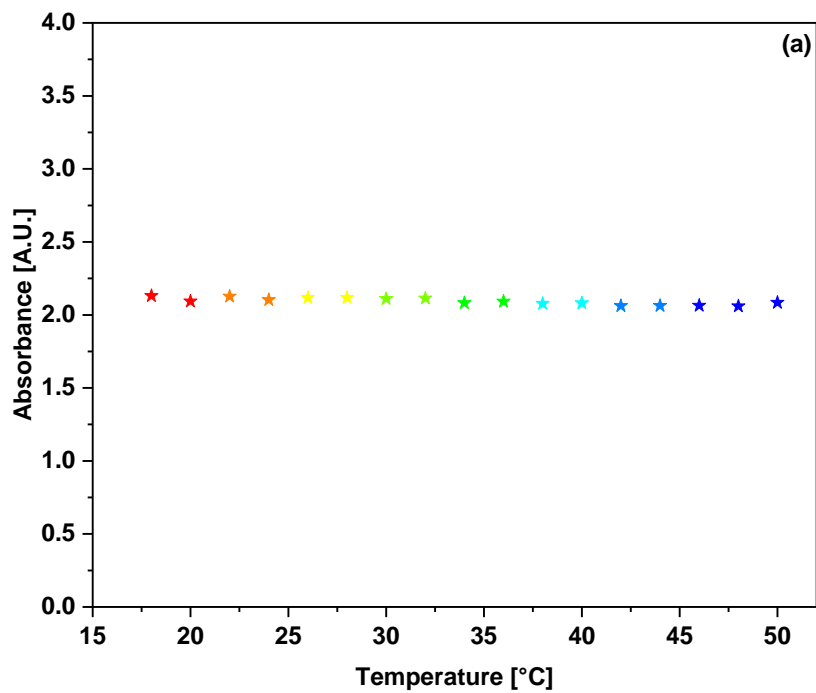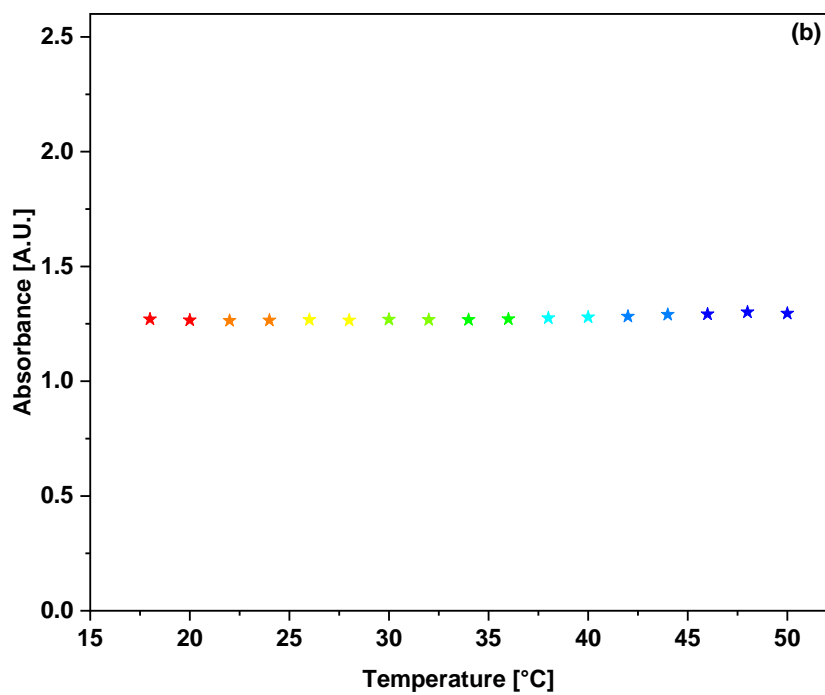

**Figure S14.** Temperature dependent absorption spectra of **GT**-metal complex solution demonstrating the trend in the absorption intensity over varying temperature range: (a) **GT**-Cu(II) (b) **GT**-Pb(II)

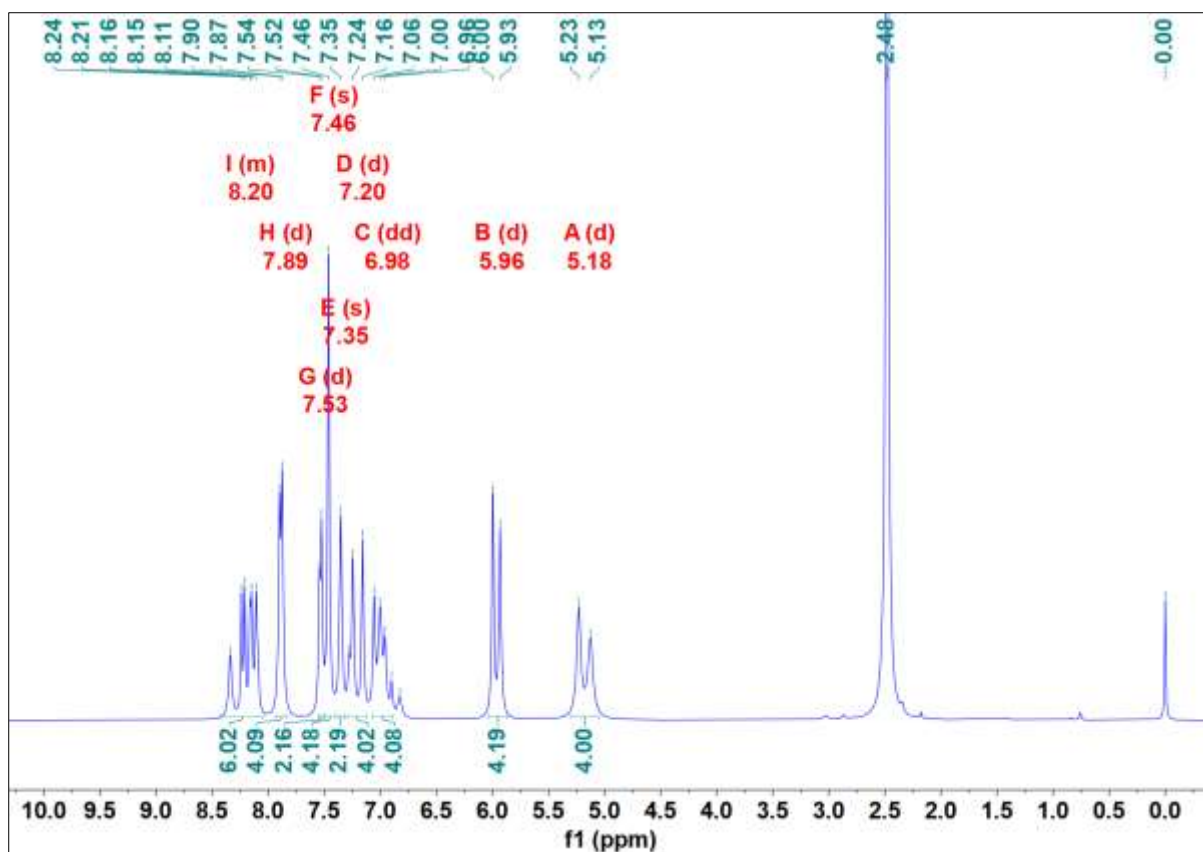

**Figure S15.**  $^1\text{H}$  NMR spectrum of GT-metal complex

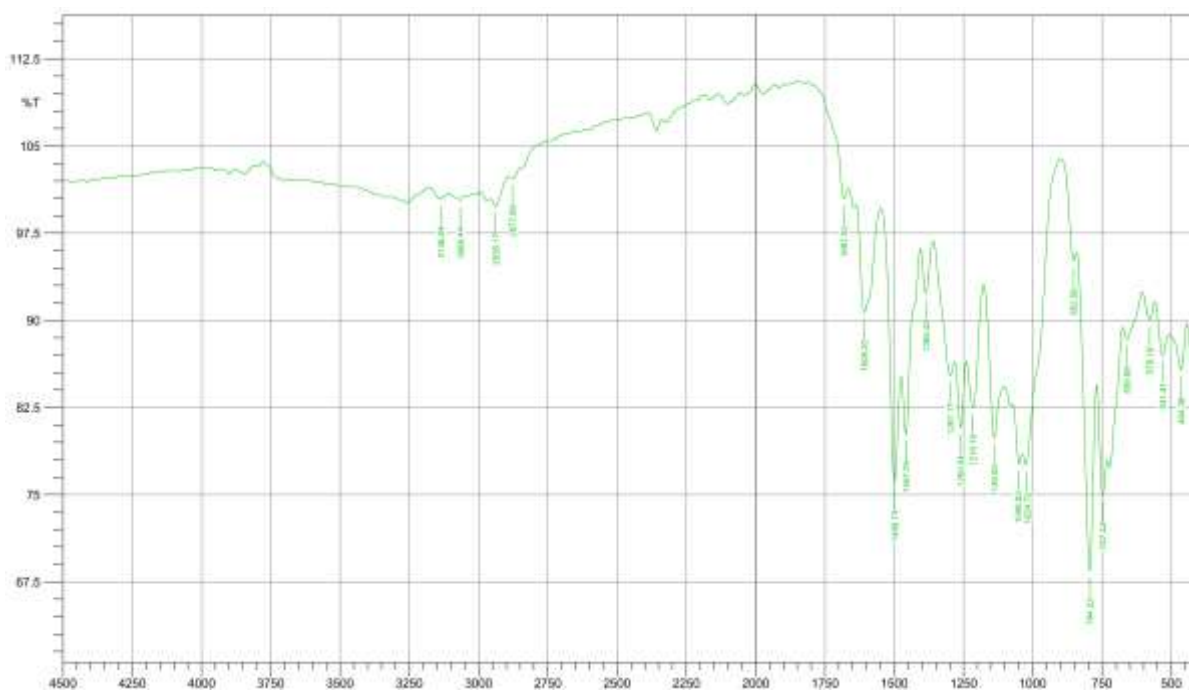

**Figure S16.** IR spectrum of GT-metal complex

| <b>Symbol</b> | <b>X</b> | <b>Y</b> | <b>Z</b> |
|---------------|----------|----------|----------|
| O             | -0.27147 | 3.832481 | -0.24321 |
| O             | 0.693632 | -1.49338 | 1.770921 |
| N             | -1.56982 | 2.428389 | 1.819619 |
| N             | 1.476497 | 0.995838 | 2.820901 |
| C             | -2.11573 | 3.573179 | 1.219712 |
| C             | 2.058398 | -0.2159  | 3.223658 |
| C             | -1.49171 | 4.288605 | 0.163628 |
| C             | 1.694236 | -1.48379 | 2.697926 |
| C             | -3.39646 | 3.965526 | 1.624624 |
| C             | 3.127117 | -0.149   | 4.124242 |
| C             | -2.14973 | 5.371582 | -0.42206 |
| C             | 2.382002 | -2.62631 | 3.109759 |
| C             | -4.03457 | 5.065719 | 1.060604 |
| C             | 3.787694 | -1.29389 | 4.556716 |
| C             | -3.40807 | 5.765715 | 0.034437 |
| C             | 3.412676 | -2.53223 | 4.045125 |
| C             | -0.32596 | 2.354683 | 2.11395  |
| C             | 0.214365 | 1.103573 | 2.634318 |
| H             | -3.87025 | 3.386272 | 2.408621 |
| H             | 3.416137 | 0.831518 | 4.484149 |
| H             | -1.68524 | 5.91947  | -1.23094 |
| H             | 2.117222 | -3.59498 | 2.707918 |
| H             | -5.01563 | 5.363706 | 1.410643 |
| H             | 4.597888 | -1.2165  | 5.271707 |
| H             | -3.89454 | 6.618284 | -0.42517 |
| H             | 3.925763 | -3.43365 | 4.359722 |
| H             | 0.38426  | 3.172931 | 1.985087 |
| H             | -0.50474 | 0.305614 | 2.823317 |
| C             | 0.342447 | 4.412461 | -1.39301 |
| H             | -0.3237  | 4.353163 | -2.26088 |
| C             | 0.414224 | -2.6971  | 1.050814 |
| H             | 1.319141 | -3.08414 | 0.57239  |

|   |          |          |          |
|---|----------|----------|----------|
| C | -0.5935  | -2.37391 | -0.00297 |
| C | -1.62568 | -1.46135 | -0.00276 |
| H | 0.032659 | -3.4577  | 1.743565 |
| N | -0.59541 | -3.0232  | -1.19918 |
| N | -1.5694  | -2.56249 | -1.93336 |
| N | -2.20125 | -1.61072 | -1.21982 |
| C | -3.32308 | -0.86888 | -1.81199 |
| H | -3.01383 | 0.17024  | -1.9408  |
| H | -3.45502 | -1.30262 | -2.80412 |
| H | -1.96836 | -0.74058 | 0.719623 |
| C | -4.59234 | -0.92375 | -0.99095 |
| C | -5.35833 | -2.12955 | -0.88355 |
| C | -5.02426 | 0.219882 | -0.3545  |
| C | -6.56199 | -2.11095 | -0.10609 |
| C | -6.2121  | 0.233714 | 0.41132  |
| H | -4.44222 | 1.131791 | -0.43924 |
| C | -6.9624  | -0.90762 | 0.532863 |
| H | -6.52216 | 1.150839 | 0.898472 |
| H | -7.87579 | -0.90695 | 1.118511 |
| C | -4.98367 | -3.34598 | -1.51593 |
| C | -7.33377 | -3.29669 | 0.004612 |
| C | -5.75718 | -4.47666 | -1.38861 |
| C | -6.94312 | -4.45531 | -0.62186 |
| H | -5.45167 | -5.39379 | -1.87943 |
| H | -7.54162 | -5.35453 | -0.52948 |
| H | -4.07273 | -3.39433 | -2.09892 |
| H | -8.24361 | -3.27132 | 0.595311 |
| H | 0.561497 | 5.470982 | -1.20485 |
| C | 1.601698 | 3.658665 | -1.6748  |
| C | 2.330688 | 2.794307 | -0.89022 |
| N | 2.238593 | 3.798127 | -2.87023 |
| N | 3.318876 | 3.071177 | -2.86589 |
| N | 3.388935 | 2.45336  | -1.67068 |

|   |          |          |          |
|---|----------|----------|----------|
| C | 4.499013 | 1.556692 | -1.37534 |
| H | 5.315685 | 1.877698 | -2.02587 |
| H | 4.806129 | 1.745767 | -0.3433  |
| C | 4.205128 | 0.079905 | -1.57894 |
| C | 2.996019 | -0.36104 | -2.06443 |
| C | 5.231055 | -0.86857 | -1.2638  |
| C | 2.735886 | -1.73935 | -2.24903 |
| H | 2.221859 | 0.353115 | -2.31616 |
| C | 4.965912 | -2.26307 | -1.4576  |
| C | 3.69847  | -2.66907 | -1.95165 |
| H | 1.767008 | -2.05613 | -2.61623 |
| H | 3.503395 | -3.7269  | -2.09313 |
| C | 6.51095  | -0.49242 | -0.77249 |
| H | 6.747297 | 0.55366  | -0.62075 |
| C | 5.978702 | -3.20896 | -1.1525  |
| C | 7.471168 | -1.43583 | -0.48711 |
| C | 7.204839 | -2.80926 | -0.67815 |
| H | 5.766599 | -4.26215 | -1.3054  |
| H | 7.969629 | -3.54348 | -0.4516  |
| H | 8.440488 | -1.12307 | -0.11535 |
| H | 2.187707 | 2.404748 | 0.103539 |

**Table S1.** Cartesian co-ordinates of probe **GT**

| <b>Symbol</b> | <b>X</b>  | <b>Y</b>  | <b>Z</b> |
|---------------|-----------|-----------|----------|
| O             | 0.173741  | -2.311697 | 1.050495 |
| O             | 0.789778  | 3.502086  | 0.311111 |
| N             | 1.523691  | -0.439272 | 2.627751 |
| N             | -1.019438 | 1.971071  | 1.993307 |
| C             | 1.610235  | -1.834742 | 2.925784 |
| C             | -1.328734 | 3.24767   | 1.464275 |
| C             | 0.910604  | -2.80894  | 2.160759 |
| C             | -0.509795 | 3.995226  | 0.568027 |
| C             | 2.461438  | -2.283896 | 3.956504 |

|   |           |           |           |
|---|-----------|-----------|-----------|
| C | -2.601022 | 3.781473  | 1.785264  |
| C | 1.014787  | -4.178152 | 2.447651  |
| C | -0.954245 | 5.201931  | 0.006952  |
| C | 2.556225  | -3.653051 | 4.263613  |
| C | -3.040727 | 5.001315  | 1.249645  |
| C | 1.829075  | -4.59897  | 3.516034  |
| C | -2.219523 | 5.711651  | 0.349708  |
| C | 0.349999  | 0.127357  | 2.604126  |
| C | 0.187177  | 1.529757  | 2.210142  |
| H | 3.012159  | -1.544663 | 4.531018  |
| H | -3.216089 | 3.223559  | 2.486077  |
| H | 0.483331  | -4.914446 | 1.849928  |
| H | -0.297429 | 5.760648  | -0.655511 |
| H | 3.192315  | -3.980132 | 5.080089  |
| H | -4.010914 | 5.39994   | 1.530419  |
| H | 1.905777  | -5.656623 | 3.750625  |
| H | -2.551198 | 6.659134  | -0.064209 |
| H | -0.572491 | -0.402559 | 2.863201  |
| H | 1.095392  | 2.122549  | 2.095129  |
| C | -1.159651 | -2.832797 | 0.754763  |
| H | -1.094787 | -3.670029 | 0.04582   |
| C | 1.213485  | 3.24307   | -1.070404 |
| H | 0.368399  | 3.304734  | -1.765723 |
| C | 1.803542  | 1.858192  | -1.040021 |
| C | 2.974408  | 1.451303  | -0.369393 |
| H | 1.971746  | 3.980371  | -1.35843  |
| N | 1.211102  | 0.714961  | -1.510058 |
| N | 1.964244  | -0.362892 | -1.137076 |
| N | 3.033152  | 0.091459  | -0.44167  |
| C | 4.016664  | -0.848854 | 0.230895  |
| H | 3.501599  | -1.215797 | 1.122376  |
| H | 4.161414  | -1.675582 | -0.47083  |
| H | 3.722034  | 2.027157  | 0.151088  |

|   |           |           |           |
|---|-----------|-----------|-----------|
| C | 5.291192  | -0.132644 | 0.601881  |
| C | 6.324673  | 0.113819  | -0.372128 |
| C | 5.460888  | 0.27052   | 1.928246  |
| C | 7.529037  | 0.780469  | 0.062823  |
| C | 6.652132  | 0.925668  | 2.349065  |
| H | 4.671781  | 0.079452  | 2.653288  |
| C | 7.663463  | 1.173632  | 1.431425  |
| H | 6.765737  | 1.221908  | 3.387085  |
| H | 8.578348  | 1.670018  | 1.746415  |
| C | 6.221921  | -0.269201 | -1.74746  |
| C | 8.573816  | 1.032685  | -0.880535 |
| C | 7.255073  | -0.012235 | -2.641524 |
| C | 8.443025  | 0.646448  | -2.207132 |
| H | 7.166707  | -0.318026 | -3.680538 |
| H | 9.242397  | 0.836917  | -2.917335 |
| H | 5.332955  | -0.783562 | -2.107885 |
| H | 9.478637  | 1.530023  | -0.540338 |
| H | -1.664595 | -3.185484 | 1.661572  |
| C | -1.891967 | -1.662739 | 0.167747  |
| C | -3.038606 | -0.998079 | 0.594227  |
| N | -1.431405 | -0.955557 | -0.928612 |
| N | -2.235012 | 0.110088  | -1.198153 |
| N | -3.211185 | 0.06      | -0.262598 |
| C | -4.258604 | 1.149487  | -0.202172 |
| H | -3.805526 | 1.964728  | 0.370335  |
| H | -4.394725 | 1.481004  | -1.236048 |
| C | -5.534364 | 0.667589  | 0.447854  |
| C | -5.808861 | 1.059573  | 1.757687  |
| C | -6.470392 | -0.159766 | -0.272506 |
| C | -7.004727 | 0.653668  | 2.414054  |
| H | -5.106307 | 1.697205  | 2.290889  |
| C | -7.679486 | -0.571335 | 0.400307  |
| C | -7.918546 | -0.148661 | 1.745713  |



|    |           |           |           |
|----|-----------|-----------|-----------|
| H  | -7.198958 | 0.980561  | 3.430787  |
| H  | -8.836434 | -0.460059 | 2.238254  |
| C  | -6.267965 | -0.587148 | -1.623974 |
| H  | -5.378909 | -0.278552 | -2.169668 |
| C  | -8.628418 | -1.386334 | -0.292704 |
| C  | -7.21082  | -1.375665 | -2.273206 |
| C  | -8.401643 | -1.783803 | -1.602825 |
| H  | -9.538194 | -1.684826 | 0.222276  |
| H  | -9.130082 | -2.396163 | -2.125093 |
| H  | -7.051742 | -1.679302 | -3.30462  |
| H  | -3.713204 | -1.192677 | 1.410955  |
| Pb | 0.071562  | -1.167396 | -2.368409 |

**Table S2:** Cartesian co-ordinates of **GT**-metal complex
